# Supplementary material
Source: PubMed Central journal article supplement (PMC2665103)
Supplement: M809468200_1.pdf [file M809468200_1.pdf]

```

NuoHEco      -----MS--WISPELIEILLTTLKAVVLLVVVTCGAFMSFGERRLLGLFQNR 46
Nqo8Pde      -----MAEFWASP-YGFALSMLLQGLAVIAFVMGSLIFMVYGDRKIWAAVOMR 47
Nqo8Tth      -----MT--WSYP-VDPYMVMVAKALLVVVGLLTAFAFMTLIERRLLARFQVR 45
NuoHRca      -----MADFWATS-LGQTLILLAQGLGIIAFVMIGLLLLVWGDRKIWAAVOMR 47
ND1Yli       -----MIINIVEILLF---LVCVLFSVAYLTVAERKTLAYMQR 36
ND1Xla       -----MLTIITHLINPLLLMIPLLAVAFLTLIERKVLGYMQHR 39
ND1Zma       MIIDRVEVETINSFSKSELFKEIYGLIWLIPIFALLGITIEVLVIVWLEREISASIQQR 60
ND1Gga       -----MTLPTLTNLLMTLSYILPLLAVAFLTLVERKILSYMQAR 41
ND1Bta       -----MFMTINILML---IPILLAVAFLTLVERKVLGYMQLR 34
ND1Hsa       -----MPMANLLLL---IVPILLAMAFLMLTERKILGYMQLR 34
EchBMba      -----MNDILTILVLIGAPIGCLASGIDRKITARLQGR 35
HycDEco      -----MSVLYPLIQALVLFAVAPLLSGITRVARARLHNR 34
HyfCEco      -----MRQTLCDGYLVIFALAQAVILLMLTPLFTGISRQIRARMHSR 42

```

```

NuoHEco      YGPNRVGWGSLQLVADMIKMFFKEDWIPKFSDRVIFTLAPMIAFTSLLAFAIVPVSPG 106
Nqo8Pde      RGNVVGPWGLLQTFADALKYIVKEIVIPAGADKFVYFLAPFLSMMLALFAFVVIPFDEG 107
Nqo8Tth      MGNRVGPFGLLQPLADAIKSIFKEDIVVAQDRFLVLAPLISVVFALLAFGLIPFGPP 105
NuoHRca      KGNVVGAFGLLQSVADAAKYVFKEIVVAGVDKPVYFLAPMLSVLALLAWVVPFEG 107
ND1Yli       LGPNFVGYGLLQAFADAKLLKEIVLPKESNYIILVISPLITLITALIGVVIPLGPG 96
ND1Xla       KGNIVGPTGLIQPIADGVKLFIKEPVRPSTSSQTMFLIAPTMALALAMSIWAPLPMP--- 97
ND1Zma       IGPEYAGPLGLLQAIADGTKLLKEDILPSRGDIPLSIGPSIAVISILLSFLVIPLGYR 120
ND1Gga       KGNIVGPFGLLQPVADGVKLFIKEPIRPSTSPPFLITPILALLALTIWVPLP--- 99
ND1Bta       KGNVVGPYGLLQPIADAIKLFIKEPLRPATSSASMFILAPIMALGLALTMWIPLPMP--- 92
ND1Hsa       KGNVVGPYGLLQPFADAMKLFTKEPLKPATSTITLYITAPTLALTIALLWTPLPMP--- 92
EchBMba      VGP-----PLLQPYYDVKKLLSKDNMVVNPSQN---FYVVVYLAFIILSLFMLVFKQ--- 85
HycDEco      RGP-----GVLQEYRDIIKLLGRQSVGP-DASGWVFRLTPYVMVGVMLTIATALPVVTV 87
HyfCEco      RGP-----GIWQDYRDIHKLFKRQEVAP-TSSGLMFRLMPWLISSMLVLAMALPLFIT 95

```

C1

```

NuoHEco      -----WVVADLNIGILFFLMAGLVAVLFAGWSSNKYSLLGAMRASAQTLSYEV 158
Nqo8Pde      -----WVMANINVGILFIFAASSLEVYGVIMGWASNSKYPFLASLRSAAQMISYEV 159
Nqo8Tth      GSFFGYQPVWIN-LDLGILYLFAVSELAVGIFLSGWASGSKYSLLGSLRSSASLISYEL 164
NuoHRca      -----WVMADINVAVLFVASSLEVYGVIMGWASNSKYPFLGSLRSAAQMISYEV 159
ND1Yli       -----ITLGELNLGILFSLAIGSLGVFGSLLGWSSNSKYSLLGSIRSTAQLISYEL 148
ND1Xla       -----FSLADLNLGILFILASSLAVYTILSGWSNSKYALIGALRAVAQTISYEV 149
ND1Zma       -----FVLADLSIGVFLWIAISSIAPIGLLMAGYSSNKYSFSGLRAAAQSISYEI 172
ND1Gga       -----FPLADLNLGLFLAMSSLTVYSLLWSGWASNSKYALIGALRAVAQTISYEV 151
ND1Bta       -----YPLINMNLGVLFMASSLAVSILWSGWASNSKYALIGALRAVAQTISYEV 144
ND1Hsa       -----NPLVNLNLGLFILATSSLAVSILWSGWASNSNYALIGALRAVAQTISYEV 144
EchBMba      -----FLMIIFVYTVASVALVVGMSTGSPYARIGSSREIMAILSYEP 128
HycDEco      -----GSPLPQLGDLITLYLFAIAREFFAISGLDTGSPFTAIGASREAMLGVLVEP 139
HyfCEco      -----VSPFAGGGDLITLIYLLALFREFFALSGLDTGSPFAGVGASRELTLGILVEP 147

```

C2

|         |                                                                |     |
|---------|----------------------------------------------------------------|-----|
| NuoHEco | FLGLSLMGVVAQAGSFNMTDIVN-SQAHV----WNVIPQFFGFITFAIAGVAVCHRHPFD   | 213 |
| Nqo8Pde | SLGLIIGIIGIISTGSMNLTAIVEAHGGDYGLLNWYWLPHLPMVVLFFVSALAEENRPPFD  | 219 |
| Nqo8Tth | GLGLALLAPVLLVGSLLNINDIVNWQKEHG----WLFLYAFP AFLVYLIASMAFAARTPFD | 220 |
| NuoHRca | SMGLIIVGVIISTGSMNLSAIVEAQRGDFGLLNWYWLPHLPMVALFFISALAEENRPPFD   | 219 |
| ND1Yli  | ILTSIFIIIMFVSSLNITTIETORV----VWYCIPLLPLLLIFFFIASVAETARPPFD     | 203 |
| ND1Xla  | TLGLILLCMIMLAGGFTYTLMTTQEQ-----MWLIIPGWPMAAMWYISTLAETNRAPPFD   | 204 |
| ND1Zma  | PLTFCVLAISLLSNSSTVDIVEAOSKYG-FFGWNLWRQPIGFLVFLISSLAECERLPPFD   | 231 |
| ND1Gga  | TLAIIILLSTIMLSGNYTLSTLAITQEP-----IYLIFSAWPLAMMWYISTLAETNRAPPFD | 206 |
| ND1Bta  | TLAIIILLSVLLMSGSFLLSTLITQEQ-----MWLILPAWPLAMMWFISTLAETNRAPPFD  | 199 |
| ND1Hsa  | TLAIIILLSTLLMSGSFNLSLITQEH-----LWLILLPSWPLAMMWFISTLAETNRTPFD   | 199 |
| EchBMba | VLILYALATYLLTGTFKLSALLDASSP-----LLMYTPLIFIAMIVVLNIKLKKSPPFD    | 181 |
| HycDEco | MLLLGLWVAAQVAGSTNISNITDVTYHWP--LSQSIPLVLALCACAFATFIEMGKLPFD    | 196 |
| HyfCEco | MLILSLLVLAIAAGSTHIEMISNTLAMG----WNSPLTTVLALACGFACFIEMGKI PFD   | 203 |

|         |                                                               |     |
|---------|---------------------------------------------------------------|-----|
| NuoHEco | QPE---AEQELADGYHIEYSGMKFGLFFVGEYIGIVTISALM-VTLFFGGWQG--PLLP-  | 266 |
| Nqo8Pde | LVE---AESELVAGFMT EYSSTPYLLFMAGEYIAMYLMCAL-SLLFFGGWLSVPVFIAD  | 275 |
| Nqo8Tth | LPE---AEQELVGGYHTEYS SIKWALFQMAEYIHFITASALI-PTLFLGGWTM--PVLEV | 274 |
| NuoHRca | LPE---AESELVAGFMT EYSSTPYLLFMAGEYIAVWLMCAL-SVLFEGGWLSPIPGVPD  | 275 |
| ND1Yli  | LTE---SESELVAGYFTEYSGSPFVFFFLAEYSNILISAFN-GYLLLGGYLSFNYSYLF   | 259 |
| ND1Xla  | LTE---GESELVSGFNVEYAGPFALFSLAEYANILMNTLSYLILFLGSSFMNQ-PELT    | 260 |
| ND1Zma  | LPE---AESELVAGYQTEYSGIKYGLFYLVSYLNLVSSLFV-TVLYLGGWNFSIPYISF   | 287 |
| ND1Gga  | LTE---GESELVSGFNVEYAGPFAMFELAEYANIMLMNTLT-TVLFLNPSFLNLPPELF   | 262 |
| ND1Bta  | LTE---GESELVSGFNVEYAGPFALFFMAEYANIIMMNI FT-AILFLGTSHPNHPPELY  | 255 |
| ND1Hsa  | LAE---GESELVSGFNIEYAGPFALFFMAEYNTIIMMNTLT-TTIFLGTTYDALSPELY   | 255 |
| EchBMba | YSTSHHGHOELIKGMTTEYGGPFATIELAHFY EYVFLTGLIFLFWASTPVIG-----    | 234 |
| HycDEco | LAE---AEQELQEGPLSEYSGSGFVWKWGISLQQLVVLQMFVGVFIPWQOMETFTAGGL   | 253 |
| HyfCEco | VAE---AEQELQEGPLTEYSGAGLALAKWGLGLKQVVMASL FVALFLPFGRAQELSLACL | 260 |

**C3**

|         |                                                              |     |
|---------|--------------------------------------------------------------|-----|
| NuoHEco | PFIWF-----ALKTAFFMMMFILIRASLPRPRYDQVMSFGWKICLPL              | 308 |
| Nqo8Pde | GWWW-----VIKMWFWFYMFAMVKAIVPRYRYDQLMRIGWKVFLPL               | 317 |
| Nqo8Tth | PYLWM-----FLKIAFFLFFFIWIRATWFLRYDQLLRFGWGFLFPL               | 316 |
| NuoHRca | GVLWM-----VAKMAAVFFVFAMVKAIVPRYRYDQLMRIGWKVFLPL              | 317 |
| ND1Yli  | NILFNDYSYVSFLFEGLINSSAYAIKLVFLMFSFIWVRAAFPRFTYDNLINFCWIILLPL | 319 |
| ND1Xla  | TISL-----MIKSSILSMIFLWVRASYPFRYDQLMHLVWKNFLPI                | 301 |
| ND1Zma  | FGFFQMNKIIG-ILEMVGIFITLTKAYLFLFISITIRWTLPRMRDQLLNLGWKFLPLI   | 346 |
| ND1Gga  | PIAL-----ATKTLSSSFLWIRASYPFRYDQLMHLVWKNFLPL                  | 303 |
| ND1Bta  | TINF-----TIKSLLLTMSFLWIRASYPFRYDQLMHLVWKNFLPL                | 296 |
| ND1Hsa  | TTYF-----VTKTLLLTSFLWIRTAYPRFRYDQLMHLVWKNFLPL                | 296 |
| EchBMba | -----VLIGIIAYLLVIVLDNITARVYQWMLKLSWTILLVI                    | 271 |
| HycDEco | LLALVIA-----IVKLVVGVLVIALFENS MARLRDLITPRITWAGFGFA           | 297 |
| HyfCEco | LTSLVVT-----LLKVVLLIFVLASIAENTLARGRFLLIHHVTWLGFSLA           | 304 |

**C4**

|         |                                                   |     |
|---------|---------------------------------------------------|-----|
| NuoHEco | TLINLLVTAAVILWQAQ-----                            | 325 |
| Nqo8Pde | SLGWVVLVAI LARYEILGGFWARFAVGG-----                | 345 |
| Nqo8Tth | ALLWFLVTALVVALDLPRTYLLYLSALSFLVLLGAVLYTPKPARKGGGA | 365 |
| NuoHRca | SLAWVVVVAFLAKFEVLGGFWARWSIGA-----                 | 345 |
| ND1Yli  | LFGIFLIIPSTLYIFDSFPTLI-----                       | 341 |
| ND1Xla  | TLAMTLWHISLPISMLGLPSQT-----                       | 323 |
| ND1Zma  | SLGNLLITTSQVLVSL-----                             | 362 |
| ND1Gga  | TLALCLWHTSMPISYAGLPPI-----                        | 324 |
| ND1Bta  | TLALCMWHVSLPILTSGIPPQT-----                       | 318 |
| ND1Hsa  | TLALLMWYVSMPTISSIPPQT-----                        | 318 |
| EchBMba | SLVNIIDTCTLVESN-----                              | 285 |
| HycDEco | FLAFVSL LAA-----                                  | 307 |
| HyfCEco | ALAWVFWLTGL-----                                  | 315 |

**Supplemental Figure 1. Similarity of the deduced amino acid sequences among the *E. coli* NuoH subunit and its homologues from various organisms.** The alignment was carried out using the ClustalW program (1). Red boxes with white letters show perfectly conserved residues among the listed organisms. Blue boxes with white letters illustrate conserved residues among at least seven organisms. Green boxes with white letters are residues that are similar among at least seven organisms. Amino acids mutated in this study are marked by arrows. Sequence sources and their Swiss-Prot accession numbers are: NuoHEco, *E. coli* K-12 NuoH subunit [P0AFD4]; Nqo8Pde, *P. denitrificans* Nqo8 subunit [P29920]; Nqo8Tth, *T. thermophilus* Nqo8 subunit [Q60019]; NuoHRca, *R. capsulatus* NuoH subunit [P42032]; ND1Yli, *Y. lipolytica* ND1 subunit [Q9B6E8]; ND1Xla, *X. laevis* ND1 subunit [P03890]; ND1Zma, *Z. mays* chloroplast ND1 subunit [P25706]; ND1Gga, *Gallus gallus* ND1 subunit [P18936]; ND1Bta, *B. taurus* ND1 subunit [P03887]; ND1Hsa, *H. sapiens* ND1 subunit [P03886]; EchBMba, *Methanosarcina barkeri* EchB subunit [O59653]; HycDEco, *E. coli* K-12 HycD subunit [P16430]; HyfCEco, *E. coli* K-12 HyfC subunit [P77858].

#### Reference List

1. Larkin, M. A., Blackshields, G., Brown, N. P., Chenna, R., McGettigan, P. A., McWilliam, H., Valentin, F., Wallace, I. M., Wilm, A., Lopez, R., Thompson, J. D., Gibson, T. J., and Higgins, D. G. (2007) *Bioinformatics*. **23**, 2947-2948
