# Supplementary material
Source: PubMed Central journal article supplement (PMC2665103)
Supplement: M809468200_2.pdf [file M809468200_2.pdf]

Supplemental Table 1: Primers used for the Cloning and mutagenesis of *E. coli nuoH* Gene.

| Primer | Sequence                                                     |
|--------|--------------------------------------------------------------|
| A      | 5'-GCTTCTGCTATCC <u>CCGG</u> GAATGCTGCGCTGG-3'               |
| D      | 5'-GCATAGAAGCCAG <u>GTCG</u> ACCGCCAGTACGTAAG-3'             |
| B      | 5'-GCAGGATCACCAA <u>AGCTTT</u> GAGGATGGTCAGCAGG-3'           |
| C      | 5'-CTGCCTGCCGCTGA <u>AGCTT</u> ATCAACTTGC-3'                 |
| E2     | 5'-GGGTCAAAGCTTCAGTGGAAACGAAAACCTCAC-3'                      |
| F2     | 5'-GGAAGATAAGCTTTCTATTTTCAATAGTTACAAATTG-3'                  |
| E36A   | 5'-CATGAGCTTTGGCG <u>C</u> ACGTCGCCTGCTGGGTCTG-3'            |
| E36D   | 5'-GCATTCATGAGCTTTGGCGA <u>T</u> CGTCGCCTGCTGGGTCTG-3'       |
| R37A   | 5'-CATGAGCTTTGGCGAA <u>GCT</u> CGCCTGCTGGGTCTG-3'            |
| R37K   | 5'-CATGAGCTTTGGCGAA <u>AAG</u> CGCCTGCTGGGTCTG-3'            |
| Q44A   | 5'-GCCTGCTGGGTCTGTT <u>CG</u> GAACCGTTACGGACC-3'             |
| R46A   | 5'-CTGGGTCTGTTCCAGAAC <u>GCT</u> TACGGACCTAACCGTG-3'         |
| R46K   | 5'-GCCTGCTGGGTCTGTTCCAGAAC <u>AAG</u> TACGGACC-3'            |
| P49A   | 5'-CCAGAACCGTTACGG <u>A</u> GCTAACCGTGTTGGCTGG-3'            |
| D63A   | 5'-CGCTCCAGCTGGTTGCGG <u>C</u> CATGATCAAAATGTTC-3'           |
| D63E   | 5'-CGCTCCAGCTGGTTGCGGA <u>G</u> ATGATCAAAATGTTC-3'           |
| D63N   | 5'-CATTTTGATCATGTT <u>TCG</u> CAACCAGCTGGAGCGAACCGCCCCAGC-3' |
| K70A   | 5'-GCGGACATGATCAAAATGTTCTTT <u>GC</u> AGAAGACTGGATCCCG-3'    |
| E71A   | 5'-GCGGACATGATCAAAATGTTCTTTAAAG <u>C</u> AGACTGGATCCCG-3'    |
| G134V  | 5'-CGCGGTGCTGTTTGC <u>G</u> TCTGGTCAAGTAACAAC-3'             |
| G134A  | 5'-GGTTTACGCGGTGCTGTTTGC <u>G</u> CTGGTCAAG-3'               |
| G134L  | 5'-GGTTTACGCGGTGCTGTTTGC <u>G</u> CTCTGGTCAAG-3'             |
| S137A  | 5'-GCGGGCTGGTCA <u>GCT</u> AACAACAATACTCGTTGCTGG-3'          |
| G145V  | 5'-CAAATACTCGTTGCTGGT <u>TG</u> CGATGCGTGCTTCTGCG-3'         |
| G145A  | 5'-CAACAATACTCGTTGCTGG <u>CT</u> GCGATGCGTGCTTC-3'           |
| R148A  | 5'-CGTTGCTGGGTGCGATG <u>GCT</u> GTCTTCTGCGCAGAC-3'           |
| S155A  | 5'-CTGCGCAGACCCTG <u>GC</u> CTACGAAGTGTTCCCTCG-3'            |
| Y156A  | 5'-CTGCGCAGACCCTGAGC <u>GCC</u> GAAAGTGTTCCCTCG-3'           |
| E157A  | 5'-GACCCTGAGCTACG <u>C</u> AGTGTTCCCTCGGGCTTTC-3'            |
| E157K  | 5'-CGCAGACCCTGAGCTAC <u>A</u> AAGTGTTCCCTCGGGCTTTC-3'        |
| V206G  | 5'-CATCGCGGGCGTGCGG <u>G</u> ATGTCACCGTCACCCGTTTG-3'         |
| R209A  | 5'-GCGTGCGGGTATGTCAC <u>GCT</u> CACCCGTTTGACCAGC-3'          |
| D213A  | 5'-GTATGTCACCGTCACCCGTTTG <u>CC</u> CAGCCGGAAG-3'            |
| E216A  | 5'-GTTTGACCAGCCGG <u>C</u> AGCCGAGCAGGAACTG-3'               |
| E218A  | 5'-GACCAGCCGGAAGCCG <u>C</u> GCAGGAACTGGCG GAT G-3'          |
| E220A  | 5'-GAAGCCGAGCAGG <u>C</u> ACTGGCGGATGGTTAC C-3'              |
| E220Q  | 5'-GAAGCCGAGCAG <u>C</u> A ACTGGCGGATGGTTAC C-3'             |
| E228A  | 5'-GGCGGATGGTTACCACATTG <u>C</u> ATATTCCGGTATGAAGTT C-3'     |
| E228Q  | 5'-GGCGGATGGTTACCACATT <u>C</u> AATATTCCGGTATGAAGTT C-3'     |
| E241A  | 5'-CTGTTCTTCGTGGGTG <u>C</u> GTACATCGGGATTGTGACCATC-3'       |
| E241Q  | 5'-CTGTTCTTCGTGGGT <u>C</u> AGTACATCGGGATTGTGACCATC-3'       |
| R286A  | 5'-GATGTTCAATTTGATT <u>GCT</u> GCGTCGTTACCGCGTCCGCG-3'       |
| R291A  | 5'-GATTCGTGCGTCGTTACCG <u>GCT</u> C CGCGTTATGACCAG-3'        |
| D295A  | 5'-GTTACCGCGTCCGCGTTATG <u>CC</u> CAGGTAATGTCCTTCGGC-3'      |
| D295E  | 5'-CGTTACCGCGTCCGCGTTATG <u>A</u> G CAGGTAATGTCCTTCGGCTGG-3' |
| K303A  | 5'-GTCCTTCGGCTGG <u>G</u> CAATCTGCCTGCCGCTG-3'               |

A-F2 represent the sequence of primers used for cloning and insertion of *spc* cassette in *E. coli nuoH* gene. The italicized bases represent the introduced restriction sites *SmaI* and *SalI* (in case of A and D, respectively) and *HindIII* (in case of B, C, E2 and F2). The underlined bases were altered from *E. coli* DNA. From E36A onwards, the sequence represents the primers used for the introduction of a site-specific mutation and the underlined bases represent mutations.
